# Supplementary material for: Increasing oxygen vacancies in CeO2 nanocrystals by Ni doping and reduced graphene oxide decoration towards electrocatalytic hydrogen evolution
Source: Royal Society of Chemistry journal article supplement (doi:10.1039/d2ce00209d), 2022-01-01
Supplement: d2ce00209d1.pdf [file d2ce00209d1.pdf]

Supporting Information for

## **Increasing Oxygen Vacancy of CeO<sub>2</sub> Nanocrystals by Ni Doping and reduced Graphene Oxides Decoration towards the Electrocatalytic Hydrogen Evolution**

*Yang Xu<sup>a,b,‡</sup>, Xiaodong Hao<sup>a,‡,\*</sup>, Xishuo Zhang<sup>a,b</sup>, Zhuangzhuang Hu<sup>b</sup>, Yujiao Chen<sup>b</sup>, Xinyi Feng<sup>a,b</sup>, Danting Li<sup>b</sup>, Wen Liu<sup>c</sup>, Fangyuan Hao<sup>c</sup>, Xingang Kong<sup>b</sup>, Chaozheng He<sup>d</sup>, Shufang Ma<sup>a</sup>, Bingshe Xu<sup>a</sup>*

<sup>a</sup>Materials Institute of Atomic and Molecular Science, Shaanxi University of Science & Technology, Xi'an 710021, China

<sup>b</sup>School of Materials Science and Engineering, Shaanxi University of Science & Technology, Xi'an 710021, China

<sup>c</sup>School of Mathematics and Statistics, Shaanxi Normal University, Xi'an 710119, China

<sup>d</sup>Institute of Environmental and Energy Catalysis, Shaanxi Key Laboratory of Optoelectronic Functional Materials and Devices, School of Materials Science and Chemical Engineering, Xi'an Technological University, Xi'an 710021, People's Republic of China

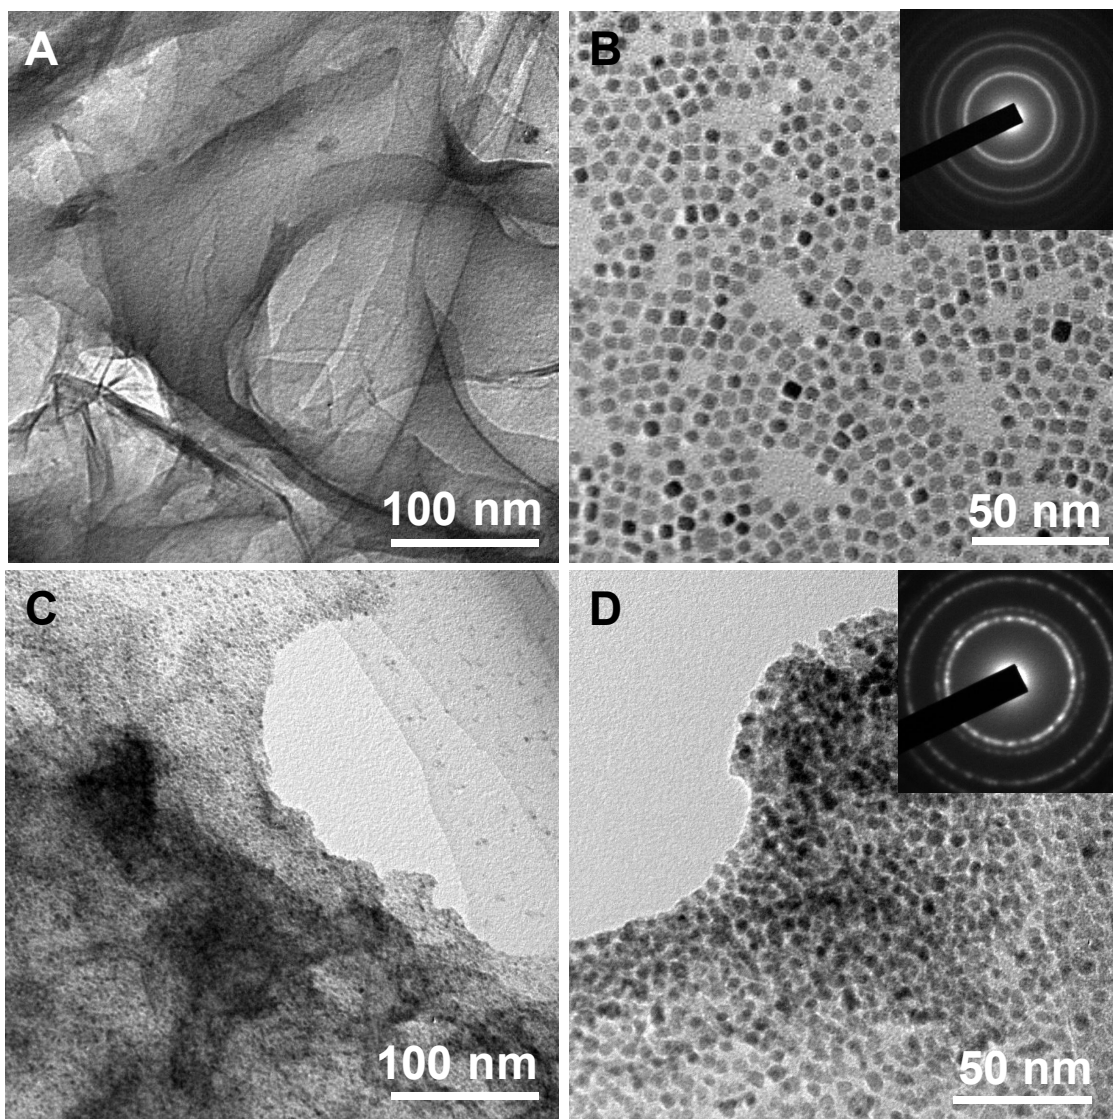

Figure S1. TEM images of the pristine rGO in (A), the as-synthesize CeO<sub>2</sub> NCs in (B) and the CeO<sub>2</sub>/rGO NCPs in (C, D).

As can be seen, the pristine rGO is composed of layered thin platelets in a large scale in Figure S1A, and after the incorporation of the uniform CeO<sub>2</sub> NCs (Figure S1B), the almost uniform distribution of CeO<sub>2</sub> NCs upon rGO sheets is obtained (Figure S1C, D).

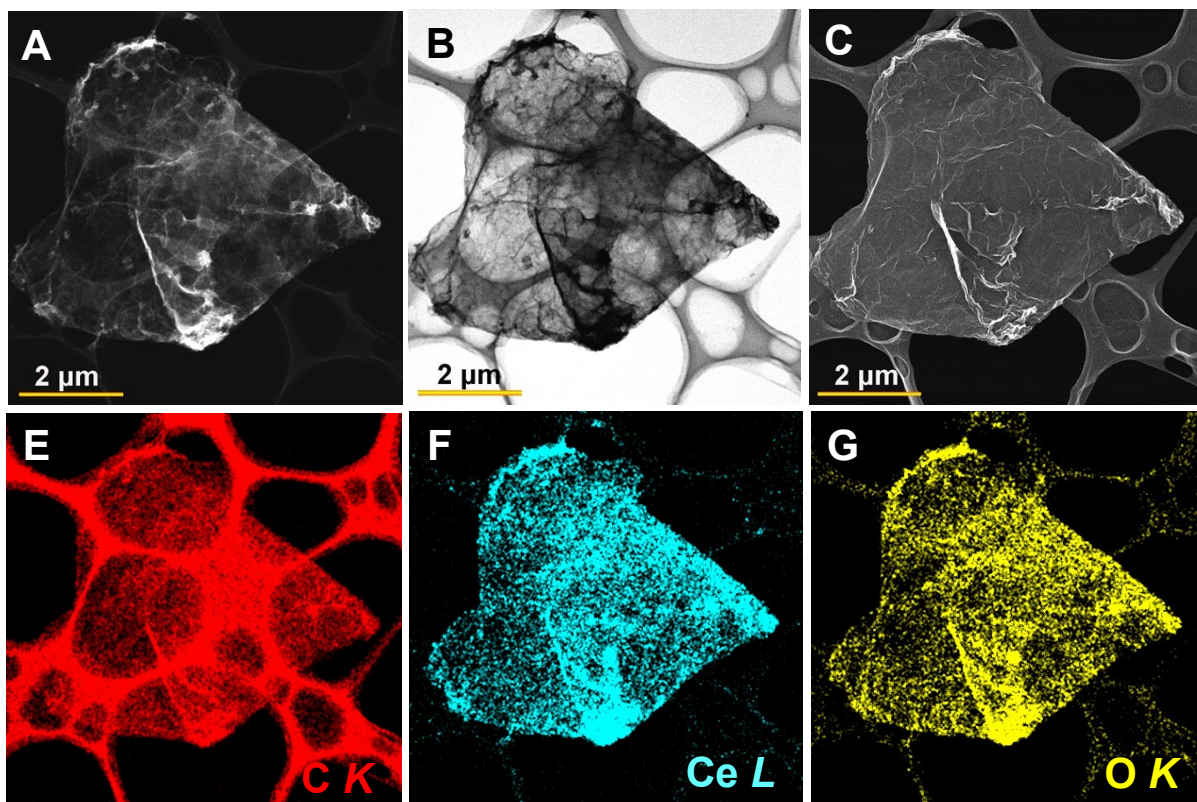

**Figure S2** The STEM images of CeO<sub>2</sub>/rGO NCPs and elemental analysis: (A) HADDF-STEM, B) ABF-STEM, C) SEI-STEM, E-G) separate elemental maps of carbon *K* edge (red), cerium *L* edge (cyan), and oxygen *K* edge (yellow), respectively.

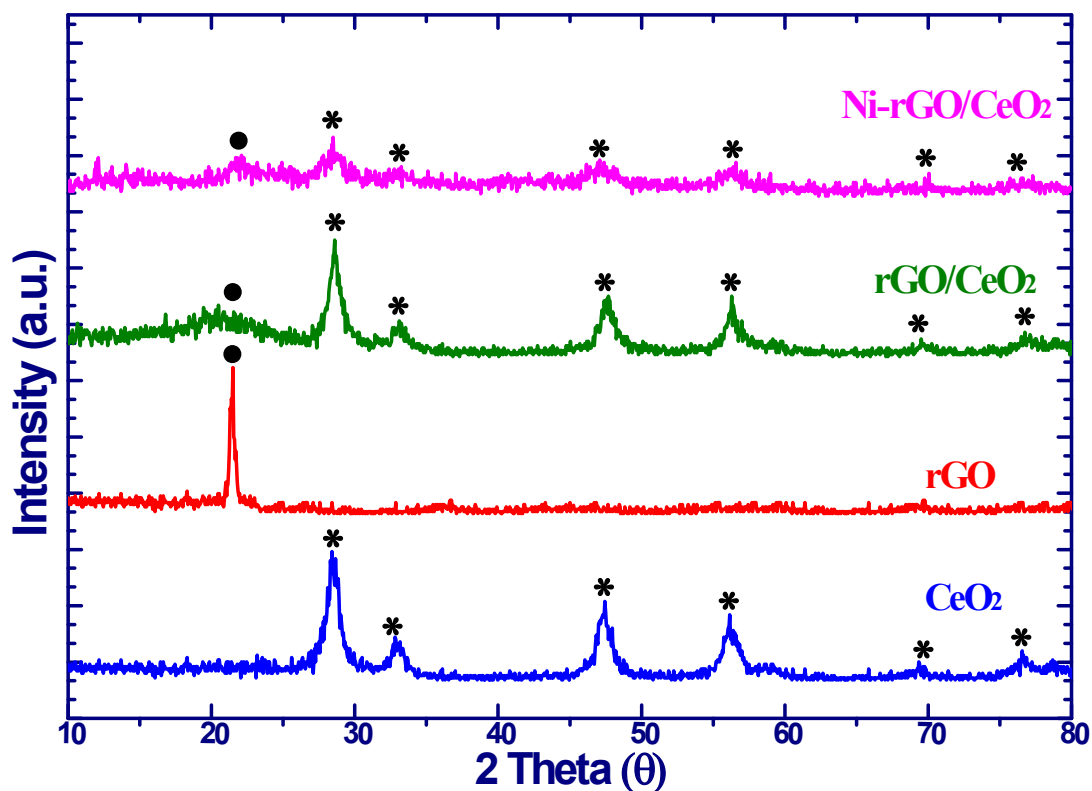

**Figure S3.** XRD spectra of as-synthesize CeO<sub>2</sub> NCs, the pristine rGO, the CeO<sub>2</sub>/rGO NCPs, and Ni-CeO<sub>2</sub>/rGO NCPs.

The XRD spectrum of the as-synthesized CeO<sub>2</sub> NCs shows the good crystallinity of with four major peaks located around 28.4°, 32.8°, 47.5°, 56.2°, which can be assigned to the 111, 200, 220 and 311 diffraction of the fluorite-cubic structure of CeO<sub>2</sub> (JCPDS, 34-0394).<sup>1</sup> Subsequently, the peak strength and peak width of rGO around 22.1° is degenerated in the large extent, comparing to that of the pristine rGO, while the the good crystallinity of the CeO<sub>2</sub> NCs is retained.

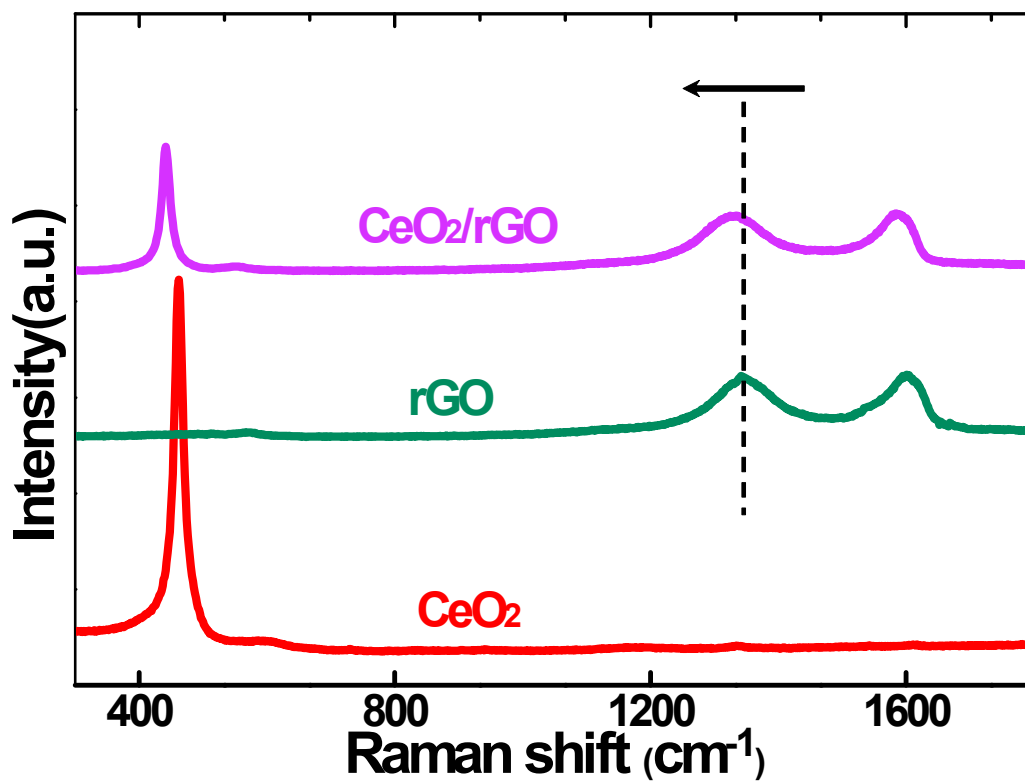

Figure S4 Raman spectra of the pristine rGO, CeO<sub>2</sub> NCs, and rGO/CeO<sub>2</sub> NCPs, respectively.

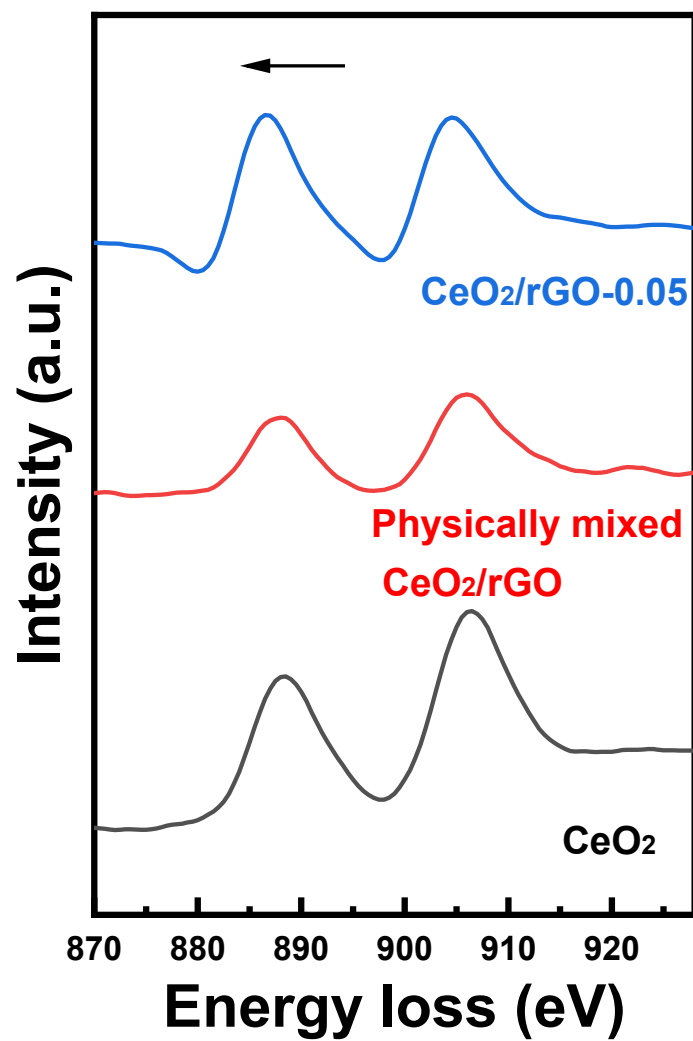

**Figure S5.** EELS spectra of the  $M$  edge of Ce for pristine  $\text{CeO}_2$ , physically mixed  $\text{CeO}_2/\text{rGO}$  and  $\text{CeO}_2/\text{rGO}-0.05$ .

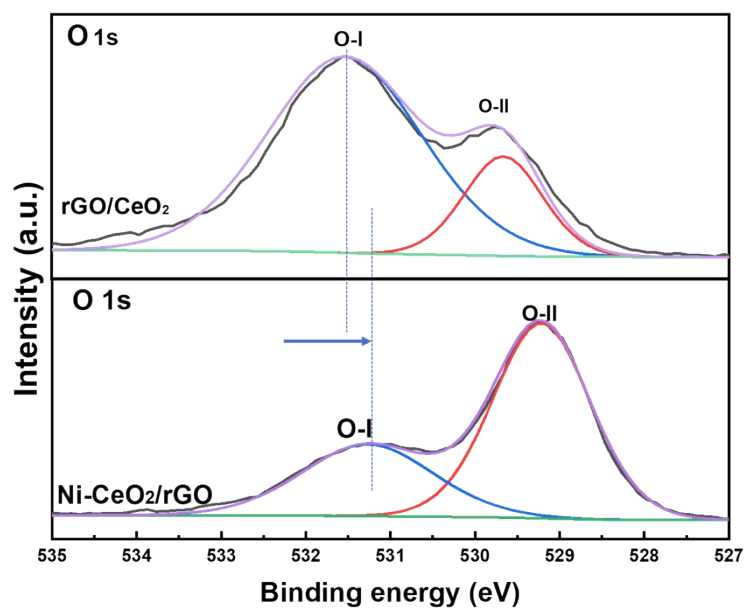

**Figure S6.** The split spectrum of O 1s of the CeO<sub>2</sub>/rGO and Ni-CeO<sub>2</sub>/rGO NCPs

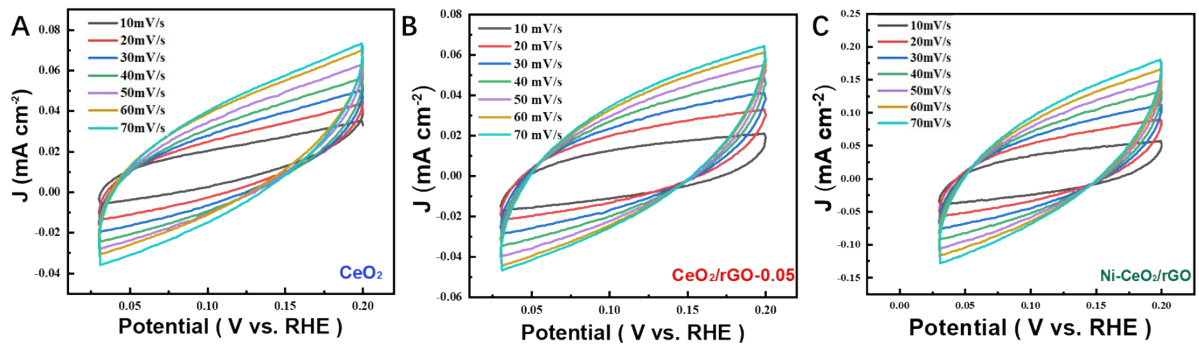

**Figure S7.** Typical cyclic voltammometry curves of (A) the pristine  $\text{CeO}_2$ , (B)  $\text{CeO}_2/\text{rGO}-0.05$ , and (C)  $\text{Ni-CeO}_2/\text{rGO}$  NCPs in 1M KOH with different scan rates.



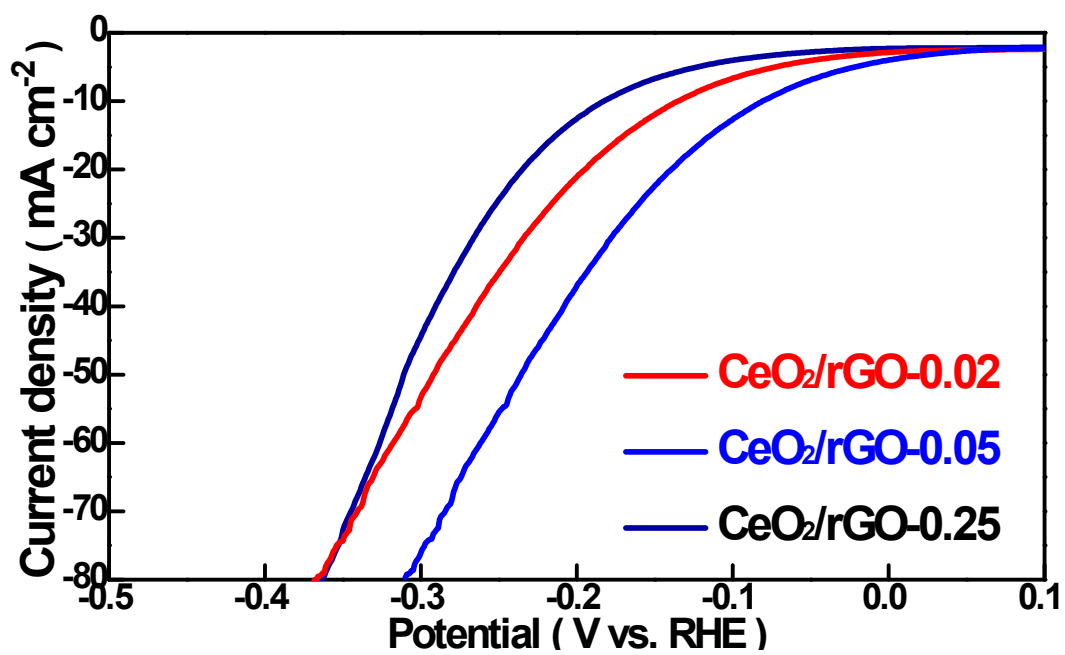

Figure S8. LSV curves of CeO<sub>2</sub>/rGO NCPs with different addition of rGO.

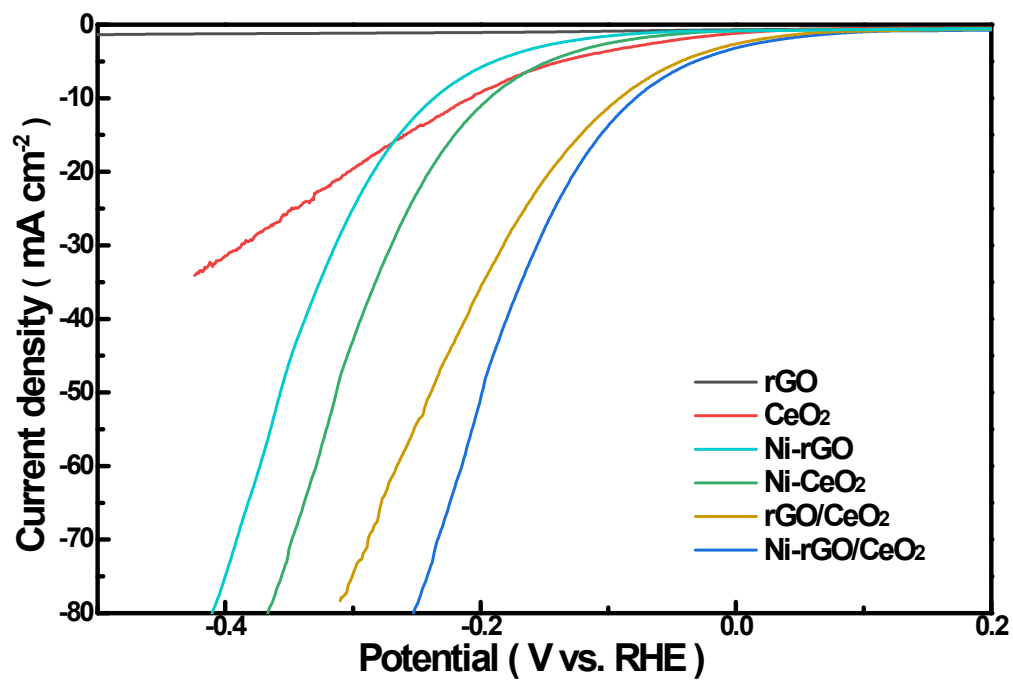

**Figure S9.** LSV curves of all the electrodes related to this study.

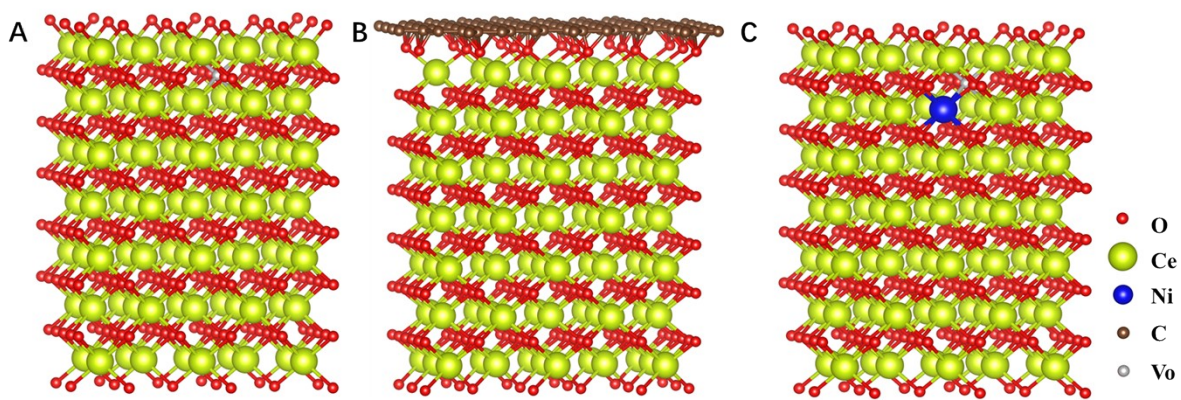

**Figure S10.** The structure models of (A) pristine CeO<sub>2</sub> after the removal of one O at the top surface layer, (B) CeO<sub>2</sub>/rGO constructed by combining the graphene layer with the oxygen end from the CeO<sub>2</sub>, and (C) Ni-CeO<sub>2</sub> with a  $V_{\text{O}}$ .

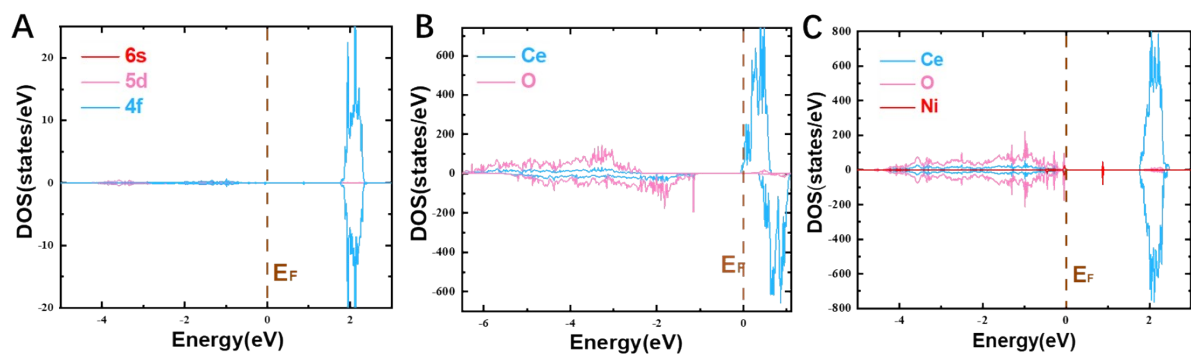

**Figure S11.** The PDOS of (A) CeO<sub>2</sub>, (B) CeO<sub>2</sub> with  $V_O$ , and (C) Ni-CeO<sub>2</sub>.

**Table S1. Comparison of HER catalytic activity in alkaline solutions with high-performance catalyst materials reported in the literature**

| <b>Catalytic materials</b>          | <b>Electrolyte</b>                  | <b>Overpotential(mV)</b> | <b>Current density (mA cm<sup>-2</sup>)</b> | <b>References</b> |
|-------------------------------------|-------------------------------------|--------------------------|---------------------------------------------|-------------------|
| Ni-rGO/CeO <sub>2</sub>             | 1M KOH                              | 113                      | 10                                          | This work         |
| rGO-MoS <sub>2</sub>                | 1M KOH                              | 146                      | 10                                          | [2]               |
| o-Ni <sub>9</sub> S <sub>8</sub>    | 1M NaOH                             | 163                      | 10                                          | [3]               |
| RGO/MoS <sub>2</sub> /Pd            | 1M KOH                              | 86                       | 10                                          | [4]               |
| 2D Mo-ReS <sub>2</sub>              | 1M KOH                              | 81                       | 10                                          | [5]               |
| Ni <sub>2</sub> P-Co <sub>2</sub> P | 1M KOH                              | 94                       | 10                                          | [6]               |
| ReSe <sub>2</sub>                   | 1M KOH                              | 109                      | 10                                          | [7]               |
| Cu-Mo-O                             | 1M KOH                              | 112                      | 10                                          | [8]               |
| NiCoP/NF                            | 1M KOH                              | 80                       | 10                                          | [9]               |
| N&S doped CNT                       | 0.5M H <sub>2</sub> SO <sub>4</sub> | 131                      | 10                                          | [10]              |

## References

- 1 X. Hao, A. Yoko, C. Chen, K. Inoue, M. Saito, G. Seong, S. Takami, T. Adschiri, Y. Ikuhara, Atomic scale valence state distribution inside ultrafine CeO<sub>2</sub> nanocubes and its size dependence, *Small*, 2018, **14**, 1802915.
- 2 Y. Zhang, H. Zhou, H. Wang, Y. Zhang, D. D. Dionysiou, Synergistic effect of reduced graphene oxide and near-infrared light on MoS<sub>2</sub>-mediated electrocatalytic hydrogen evolution, *Chem. Eng. J.*, 2021, **418**, 129343.
- 3 M. G. da Silva, C. M. Leite, M. A. Cordeiro, V. R. Mastelaro, E. R. Leite, One-Step Synthesis of Nickel Sulfides and Their Electrocatalytic Activities for Hydrogen Evolution Reaction: A Case Study of Crystalline h-NiS and o-Ni<sub>9</sub>S<sub>8</sub> Nanoparticles, *ACS Appl. Energy Mater.*, 2020, **3**, 9498.
- 4 A. Pandey, A. Mukherjee, S. Chakrabarty, D. Chanda, S. Basu, Interface engineering of an RGO/MoS<sub>2</sub>/Pd 2D heterostructure for electrocatalytic overall water splitting in alkaline medium, *ACS Appl. Mater. Interfaces*, 2019, **11**, 42094.
- 5 J. Xu, C. Fang, Z. Zhu, J. Wang, B. Yu, J. Zhang, Nanoscale engineering and Mo-doping of 2D ultrathin ReS<sub>2</sub> nanosheets for remarkable electrocatalytic hydrogen generation, *Nanoscale*, 2020, **12**, 17045.
- 6 Q. Cao, S. Hao, Y. Wu, K. Pei, W. You, R. Che, Interfacial charge redistribution in interconnected network of Ni<sub>2</sub>P–Co<sub>2</sub>P boosting electrocatalytic hydrogen evolution in both acidic and alkaline conditions, *Chem. Eng. J.*, 2021, 130444.
- 7 I. S. Kwon, I. H. Kwak, S. Ju, S. Kang, S. Han, Y. C. Park, J. Park, J. Park, Adatom Doping of Transition Metals in ReSe<sub>2</sub> Nanosheets for Enhanced Electrocatalytic Hydrogen Evolution Reaction, *ACS Nano*, 2020, **14**, 12184.
- 8 A. Wang, L. Zhao, H. Liu, Z. Zhou, C. Li, Y. Xiang, W. Zhou, F. Hao, Dynamically controlled growth of Cu–Mo–O nanosheets for efficient electrocatalytic hydrogen evolution, *Journal of Materials Chemistry C*, 2020, **8**, 9337.
- 9 H. Liu, X. Ma, H. Hu, Y. Pan, W. Zhao, J. Liu, X. Zhao, J. Wang, Z. Yang, Q. Zhao, Robust NiCoP/CoP heterostructures for highly efficient hydrogen evolution electrocatalysis in alkaline solution, *ACS Appl. Mater. Interfaces*, 2019, **11**, 15528.
- 10 H. Wu, Z. Chen, F. Xiao, Y. Wang, E. Cao, S. Chen, S. Du, Y. Wu, Z. Ren, Tunable doping of N and S in carbon nanotubes by retarding pyrolysis-gas diffusion to promote electrocatalytic hydrogen evolution, *Chem. Comm.*, 2019, **55**, 10011.
